# Supplementary material for: Layered coating of ultraflexible graphene-based electrodes for high-performance in-plane quasi-solid-state micro-supercapacitors
Source: Royal Society of Chemistry journal article supplement (doi:10.1039/c9nr03917a), 2019-01-01
Supplement: c9nr03917a1.pdf [file c9nr03917a1.pdf]

## Layered Coating of Ultraflexible Graphene-Based Electrodes for High-Performance In-plane Quasi-Solid-State Micro-supercapacitor

Jingwei Du,<sup>a,b,‡</sup> Xuemei Mu,<sup>a,b,‡</sup> Yirong Zhao,<sup>a,b</sup> Yaxiong Zhang,<sup>a,b</sup> Shengming Zhang,<sup>a,b</sup> Baoyu

Huang,<sup>a,b</sup> Yingzhuo Sheng,<sup>a,b</sup> Yizhu Xie,<sup>c</sup> Zhenxing Zhang,<sup>a,b,\*</sup>, Erqing Xie,<sup>a,b,\*</sup>

<sup>a</sup>. School of Physical Science and Technology, Lanzhou University, Lanzhou 730000, China

<sup>b</sup>. Key Laboratory for Magnetism and Magnetic Materials of the Ministry of Education, Lanzhou University, Lanzhou 730000, China

<sup>c</sup>. Shenzhen Key Laboratory of Advanced Thin Films and Applications, College of Physics and Energy, Shenzhen University, Shenzhen 518060, China

\* Corresponding author: E-mail: zhangzx@lzu.edu.cn (Z.Zhang); xieeq@lzu.edu.cn (E.Xie)

‡ These authors contributed equally.

### Calculation

The areal capacitance from CV curves can be calculated by Eq. 1:

$$C_A = \frac{\int I(v)dv}{AVS} \quad (1)$$

Where  $C_A$  is the areal capacitance ( $\text{mF cm}^{-2}$ ),  $I$  is the response current (A),  $A$  is the area of electrodes ( $\text{cm}^2$ ),  $V$  is the voltage window (V), and  $S$  is the scan rate ( $\text{mV s}^{-1}$ ). The specific capacitance from

GCD curves can be calculated by Eq. 2:

$$C_A = \frac{I\Delta t}{AV} \quad (2)$$

Where  $C_A$  is the areal capacitance ( $\text{mF cm}^{-2}$ ),  $I$  is the discharge current (A),  $A$  is the area of electrode ( $\text{cm}^2$ ),  $\Delta t$  is the discharge time (s), and  $V$  is the voltage window (V).

The energy density of the device can be calculated by the Eq. 3:

$$E = \frac{C * V^2}{2 * h} \quad (3)$$

and the power density is given by Eq. 4:

$$P = \frac{E}{t} \quad (4)$$

Where  $E$  is the energy density ( $\text{Wh cm}^{-3}$ ),  $C$  is the areal capacitance ( $\text{mF cm}^{-2}$ ) calculated by GCD curves,  $V$  is the voltage window (V),  $h$  is the thickness of electrode (cm),  $P$  is the volumetric power density ( $\text{W cm}^{-3}$ ), and  $t$  is the discharge time (s).

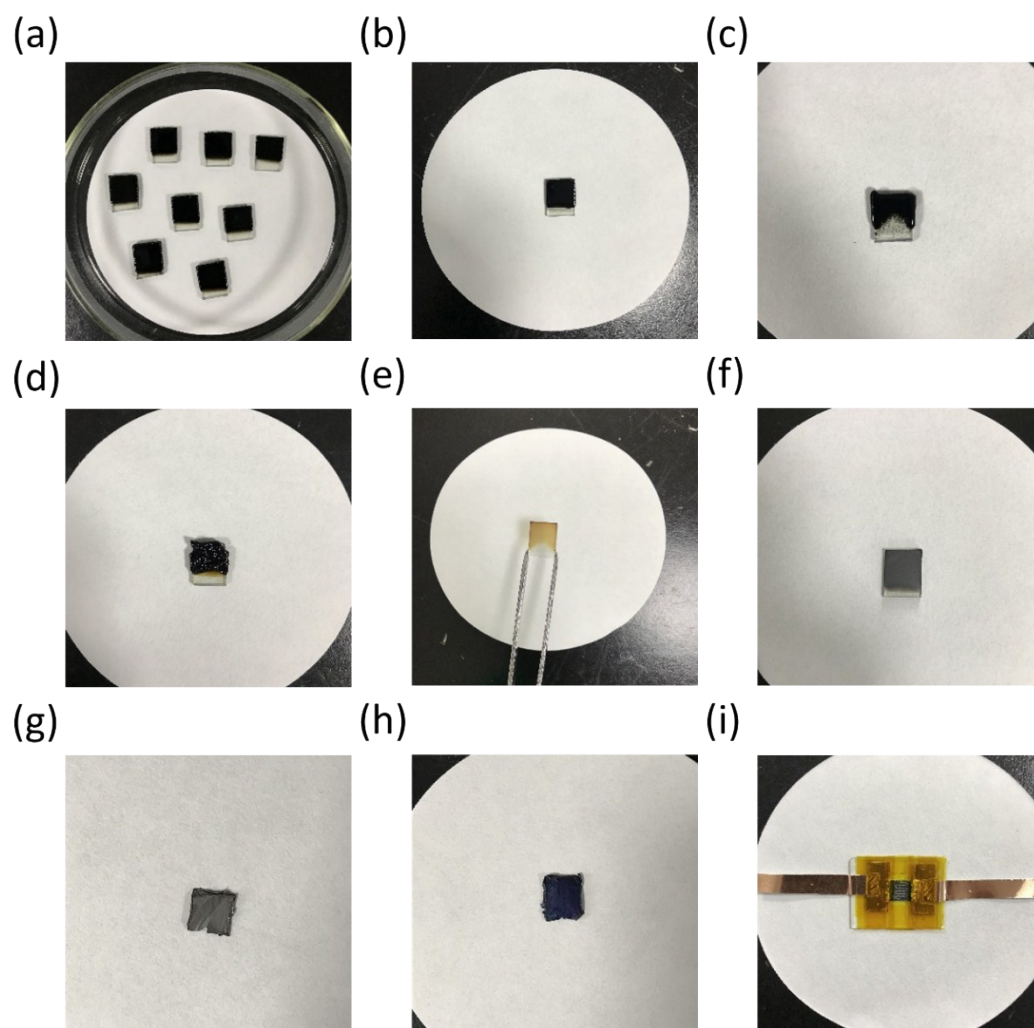

**Fig. S1.** Digital photos of devices at each fabrication step. (a) and (b) The images of pre-reduced GO (p-rGO) films taken immediately after EPD and the size of FTO glass is 1.2 cm \* 1.6 cm. (c) p-rGO film which was partially reduced by L-AA. (d) P-rGO film which was reduced deeply. (e) Non-reduced GO film. (f) The dry p-rGO film. (g) The completely reduced rGO film (c-rGO). (h) The MGF. (i) The MSC based on MGFs.

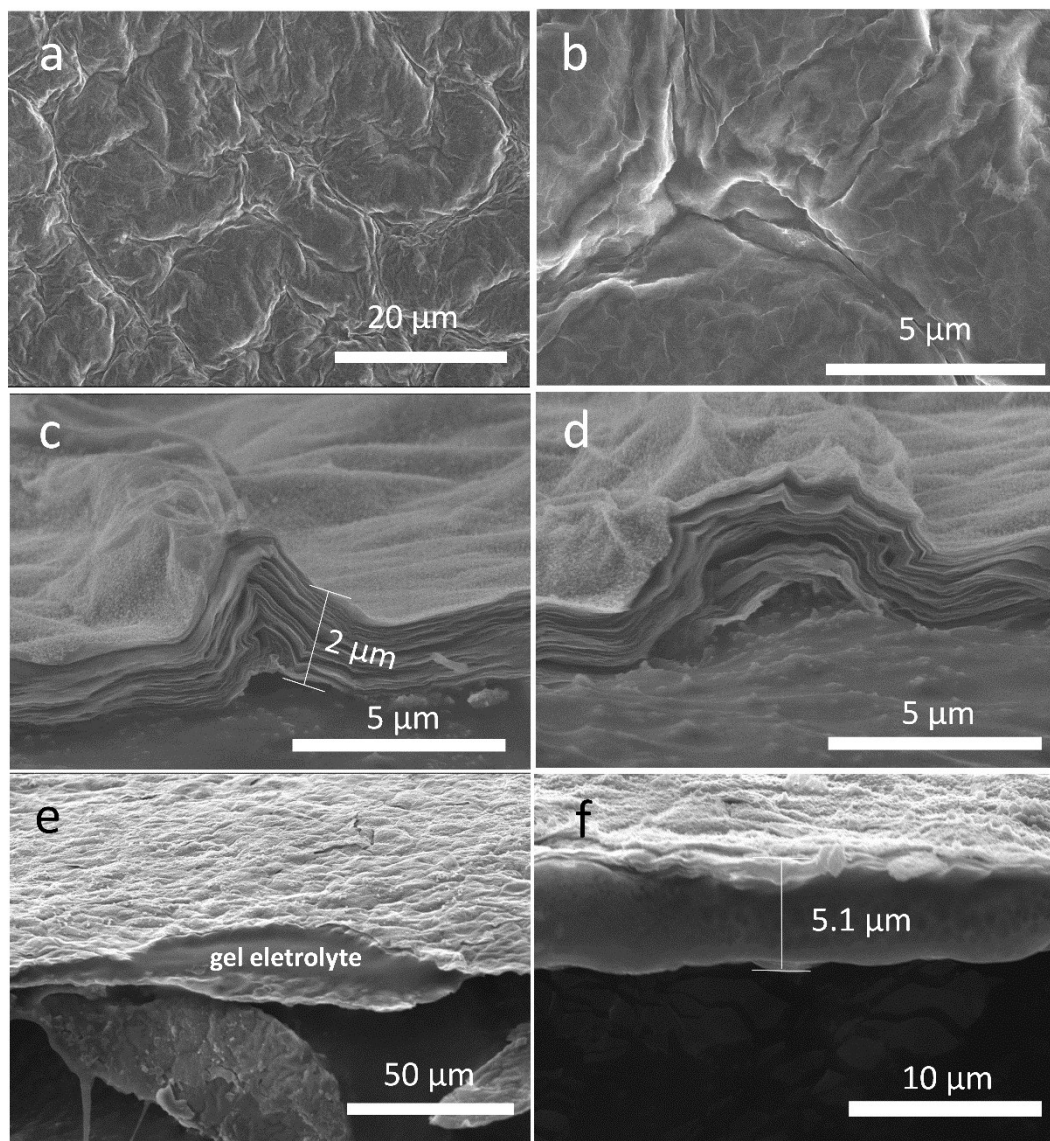

**Fig. S2.** (a) and (b) SEM images of c-rGO. (c) and (d) Cross-section image of MGF-60 showing the thickness of MGF-60 is about 2  $\mu\text{m}$ . (e) and (f) Cross-section image of MGF-60-2.

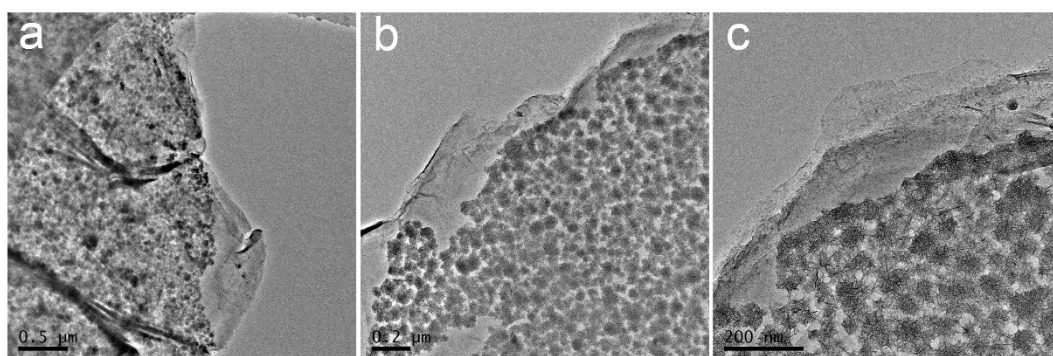

**Fig. S3.** (a), (b) and (c) TEM images of MGF-60.

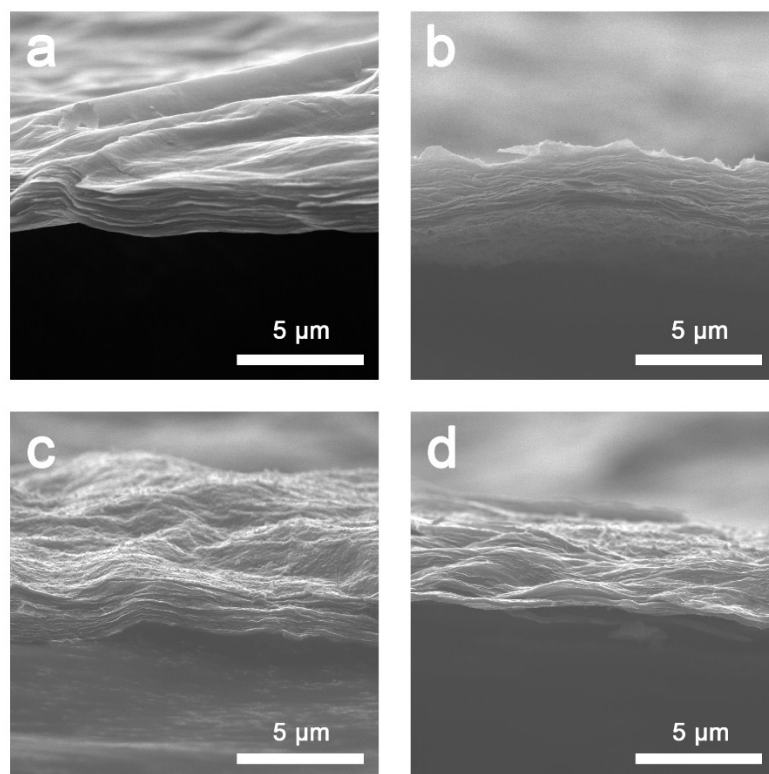

**Fig. S4.** Cross-section images of (a) MGF-0, (b) MGF-30, (c) MGF-90 and (d) MGF-120.

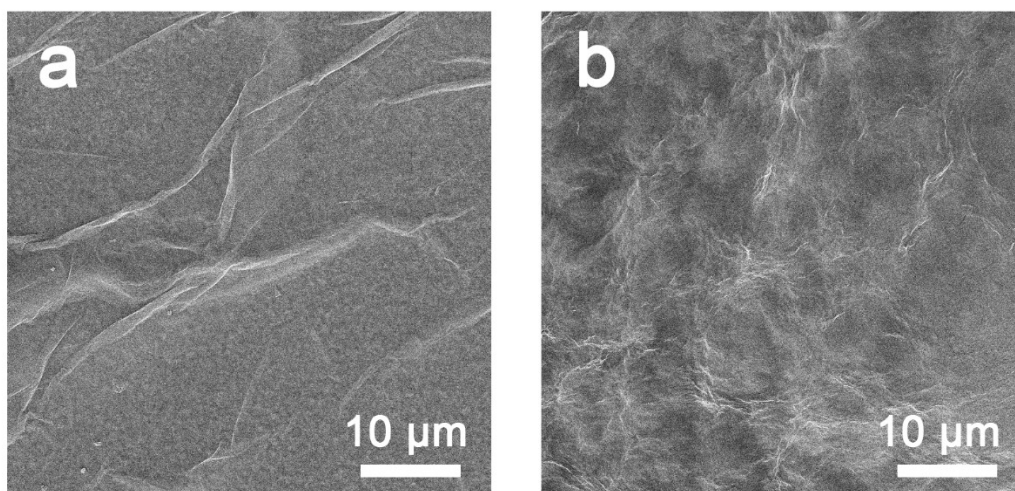

**Fig. S5.** SEM images of (a) GO and (b) p-rGO.

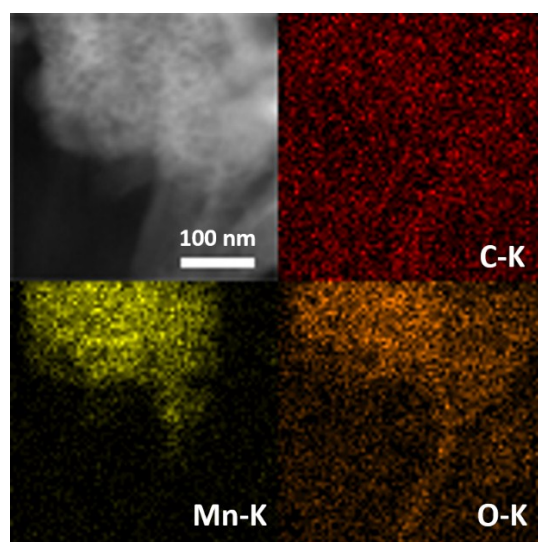

**Fig. S6.** Element mapping images of MGF.

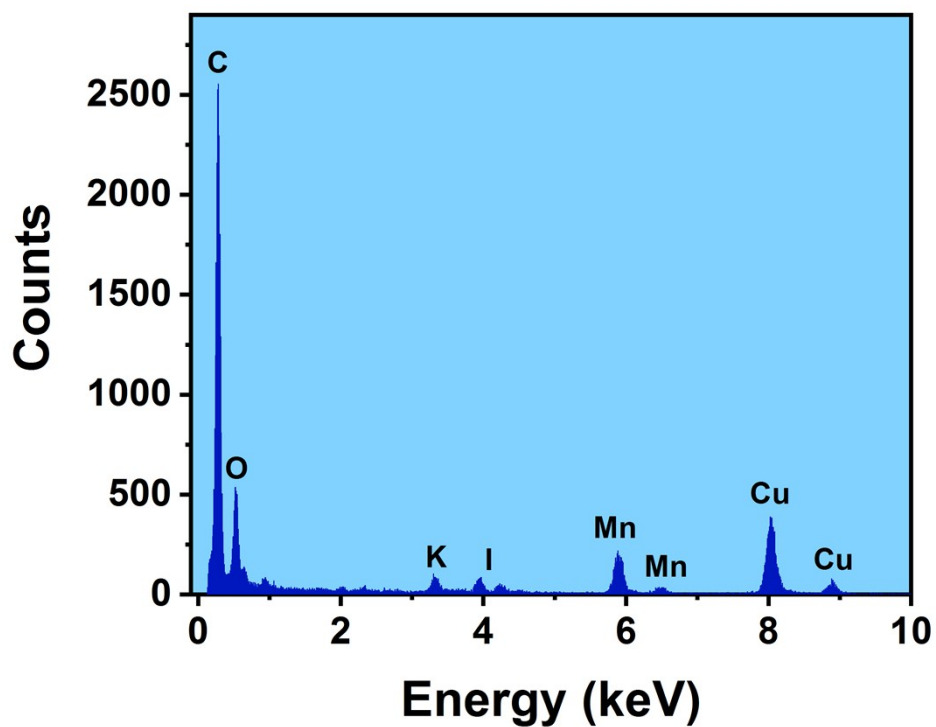

Fig. S7. EDX spectrum of MGF-60.

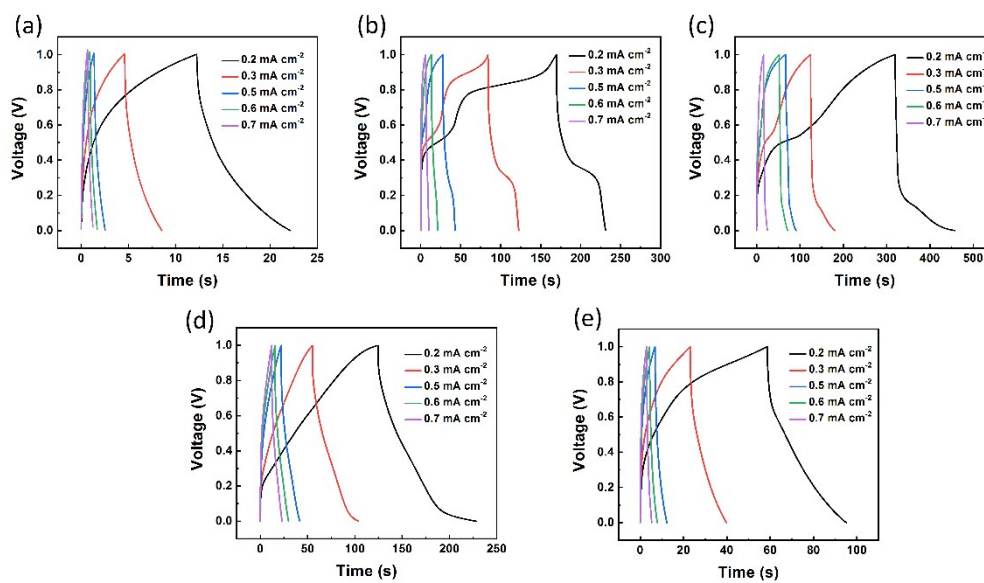

Fig. S8. GCD curves of each device with different hydrothermal growth time at current density ranging from  $0.2 \text{ mA cm}^{-2}$  to  $0.7 \text{ mA cm}^{-2}$ . (a) MGF-0-2. (b) MGF-30-2. (c) MGF-60-2. (d) MGF-

90-2. (e) MGF-120-2.

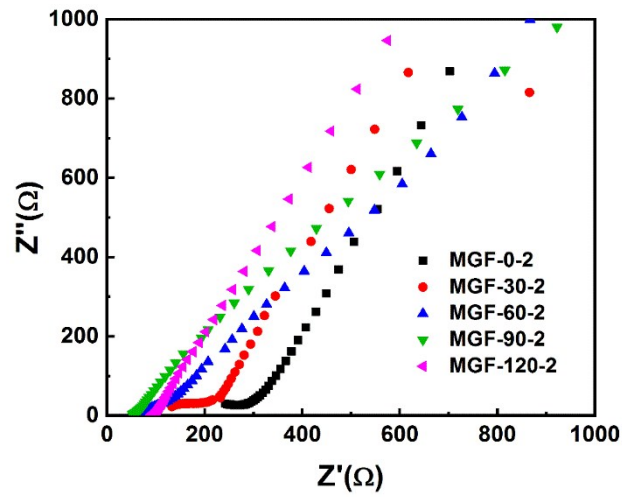

Fig. S9. Magnified Nyquist plots in the high-frequency region of samples.

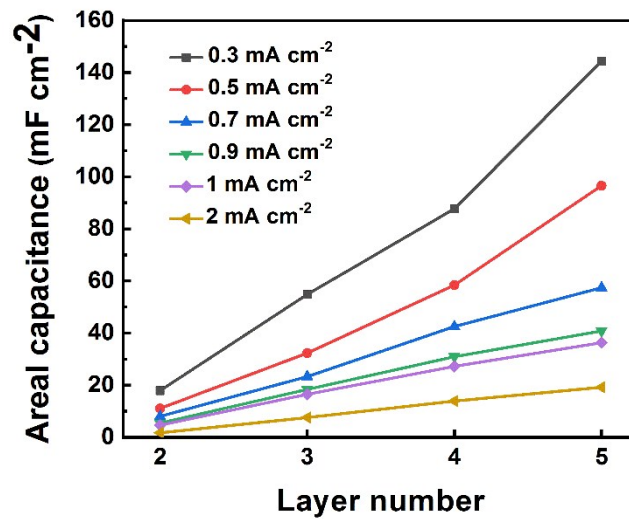

Fig. S10. The areal capacitance of MSCs based on MGF-60 with different number of layers at different current density.



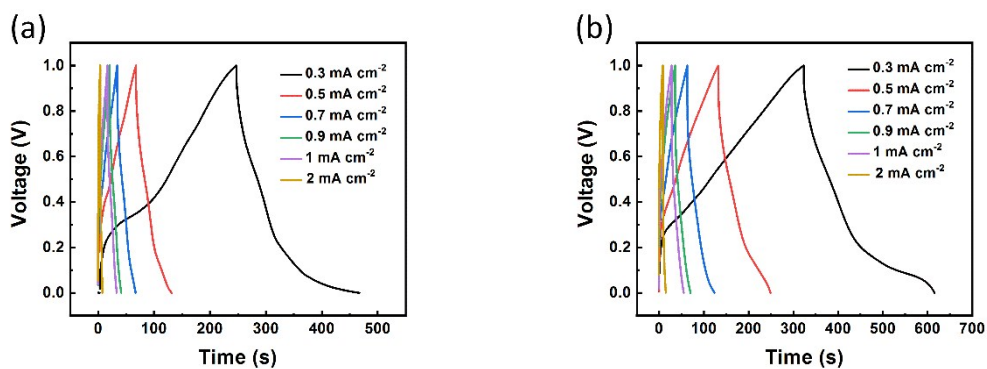

**Fig. S11.** (a) GCD curves of MGF-60-3. (b) GCD curves of MGF-60-4.

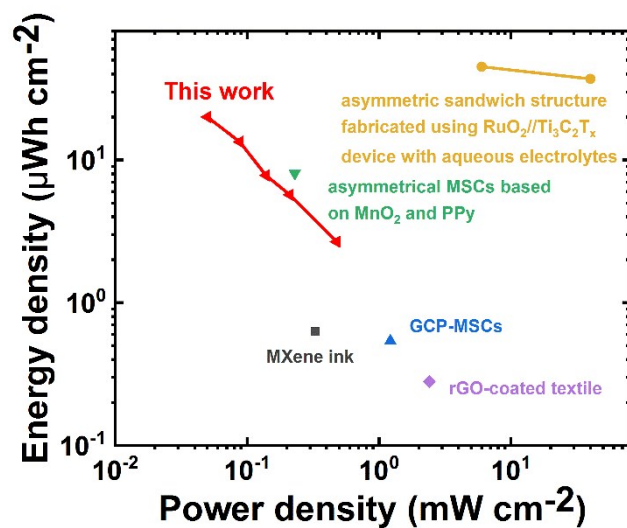

**Fig. S12.** Ragone plots show the areal energy density and power density of the MGF-60-5 MSC in comparison with other MSCs based on Mxene-RuO<sub>2</sub>, Mxene ink, GCP-MSCs, rGO-coated textile,

MnO<sub>2</sub> and PPy.
